# Supplementary material
Source: publisher site journal article supplement (https://www.dovepress.com/article/589240)
Supplement: Supplementary file 1 [file 589240%20Supplementary%20File.docx]

**Supplementary File 1. Multiplex application-based targeted next-generation sequencing.**

**1. Sample Preparation and Nucleic Acid Extraction**

Targeted next-generation sequencing (tNGS) was performed using the Respiratory Pathogen Detection Kit (KS608-100HXD96; KingCreate, Guangzhou, China), following a standardized workflow adapted from previously described protocols .

(1) Tissue specimens

Pleural biopsy tissues were processed directly for tNGS analysis. Briefly, specimens were sequentially rinsed with 0.5 mL absolute ethanol and 1 mL phosphate-buffered saline (PBS) to remove surface contaminants. The volume was then adjusted to 1 mL with PBS, followed by mechanical homogenization to ensure adequate lysis and nucleic acid release.

(2) Sputum and pleural fluid specimens

A total of 650 μL of specimen was mixed with an equal volume of dithiothreitol (final concentration 0.1 M) to achieve liquefaction, followed by vortexing and incubation. The homogenized samples were centrifuged for enrichment, and 500 μL of the processed sample was used for downstream nucleic acid extraction.

Total nucleic acids (DNA and RNA) were extracted and purified using the MagPure Pathogen DNA/RNA Kit (R6672-01B; Magen, Guangzhou, China) according to the manufacturer’s instructions.

To ensure analytical reliability, both positive and negative controls provided in the kit were included in each batch to monitor the entire experimental workflow.

**2. Library Construction and Sequencing**

The library construction was performed using the RP100™ Respiratory Pathogen Multiplex Testing Kit (KingCreate, Guangzhou, China). The generated libraries were quantified using the Equalbit DNA HS Assay Kit (Vazyme, Nanjing, Jiangsu, China) and the Invitrogen™ Qubit™A 4.0 Fluorometer (Thermo Fisher, Waltham, MA, USA) to ensure that the library density was ≥0.5 ng/μL for all samples. Samples with inadequate density underwent library reconstruction. Qualified libraries were subjected to single-end 100 bp sequencing on the Illumina MiniSeq platform (San Diego, USA) using the MiniSeq Rapid Reagent Kit (100 cycles), generating approximately 100,000 sequencing reads per sample.

**3. Data Quality Control and Analysis**

Raw data were processed using Fastp v0.20.1 for adapter trimming and low-quality read filtering. The filtered data were aligned to a reference database using Bowtie2 v2.4.1 in "very-sensitive" mode. The number of reads per 100,000 sequencing reads (RPhK) was calculated for each species and genus level, which were then used for downstream analysis. Thresholds for species identification were established based on retrospective study data, with virus, bacteria, and fungi thresholds set at 7, 15, and 11 RPhK, respectively.

**4. Primer Design**

The primers for the tNGS panel were designed to target 198 pathogens commonly encountered in clinical settings. Key design features included:

- **GC Content**: 40% to 60%
- **Primer Length**: 18 to 26 base pairs
- **Tm Value**: Approximately 60°C
- **Avoidance**: Self-dimers, hairpins, and cross-dimers for significant pathogens (e.g., *Mycobacterium tuberculosis complex* and *SARS-CoV-2*), multiple primers were designed to ensure high sensitivity for amplification.

**5. Data Processing and Pathogen Identification**

Sequencing data were compared to a pathogen database for identification. The database was curated from NCBI Refseq/nt, with redundant sequences and high similarity sequences removed. Phage sequences and artificial sequences (e.g., plasmids) were filtered out. The database was cleaned and annotated to improve accuracy and reduce bias. MUSCLE (v3.8.31) was used to perform alignment and generate interspecific SNP profiles for phylogenetic analysis and downstream processing.

**6. Data Quality Control Standards**

tNGS data quality control included the following:

- **Total Reads per Sample**: A minimum of 100,000 sequencing reads were generated per sample.
- **Q30 Filtering Pass Rate**: Only samples meeting predefined quality control criteria (Q30 score ≥75%, ≥50,000 clean reads) were analyzed.
- **Defining tNGS-Positive or Negative Results**: Thresholds for positive identification were set based on retrospective data:
  - **Viruses**: 7 RPhK
  - **Bacteria**: 15 RPhK
  - **Fungi**: 11 RPhK

These quality control measures ensured the high quality and reliability of the data used for pathogen identification. Samples not meeting quality control criteria or with read counts below threshold were considered negative. No indeterminate category was defined; low-level signals below threshold were interpreted as negative to minimize false-positive reporting.

| **Supplementary Table 1. Clinicopathological characteristics of the study cohort (n=142).** | | | | | | | | | | | | | | | |
| --- | --- | --- | --- | --- | --- | --- | --- | --- | --- | --- | --- | --- | --- | --- | --- |
| Number | Sex | Age | IGRAs | Pleural effusion | | | | | Pleural biopsy | | | Sputum | | | Diagnosis |
| MTB Culture | Xpert MTB/RIF | tNGS | ADA levels | Location | MTB Culture | Xpert MTB/RIF | tNGS | MTB Culture | Xpert MTB/RIF | tNGS |
| P001 | Male | 65 | Positive | ND | ND | ND | ND | Left | ND | ND | ND | Negative | Negative | Positive | Clinically diagnosed TB |
| P002 | Male | 61 | Positive | Negative | ND | ND | 16 | Left | ND | ND | ND | Negative | Negative | Negative | Clinically diagnosed TB |
| P003 | Male | 87 | Positive | Negative | ND | ND | 13 | Bilateral | ND | ND | ND | Positive | Positive | Positive | Bacteriologically confirmed TB |
| P004 | Male | 68 | ND | Negative | Negative | Negative | 12 | Left | Negative | ND | ND | ND | Negative | Negative | Non-TB |
| P005 | Male | 33 | Positive | Negative | Negative | Negative | 76 | Bilateral | ND | ND | ND | ND | Negative | Positive | Clinically diagnosed TB |
| P006 | Male | 67 | Negative | ND | Positive | Positive | 65 | Left | ND | ND | ND | ND | Negative | Positive | Bacteriologically confirmed TB |
| P007 | Male | 15 | Positive | Negative | ND | Negative | 57 | Left | Negative | Negative | Positive | Negative | ND | ND | Clinically diagnosed TB |
| P008 | Male | 45 | Negative | ND | Negative | Negative | ND | Right | Negative | Negative | Negative | ND | ND | ND | Clinically diagnosed TB |
| P009 | Female | 41 | Positive | Negative | Negative | Positive | 43 | Right | Negative | Negative | ND | ND | ND | ND | Clinically diagnosed TB |
| P010 | Male | 86 | Positive | Negative | Negative | Negative | 14 | Bilateral | ND | ND | ND | Negative | ND | ND | Clinically diagnosed TB |
| P011 | Male | 60 | Positive | Negative | Negative | Negative | 8 | Left | Negative | Negative | ND | ND | ND | ND | Clinically diagnosed TB |
| P012 | Male | 20 | Positive | Negative | Negative | Negative | 63 | Right | ND | ND | ND | Negative | Negative | ND | Clinically diagnosed TB |
| P013 | Female | 22 | Positive | Negative | Negative | Positive | 44 | Left | ND | ND | ND | Negative | ND | ND | Clinically diagnosed TB |
| P014 | Male | 81 | Negative | Negative | Negative | Negative | 23 | Right | ND | ND | ND | Negative | ND | ND | Clinically diagnosed TB |
| P015 | Male | 42 | Positive | Negative | Negative | Positive | 32 | Right | ND | ND | ND | Negative | ND | ND | Clinically diagnosed TB |
| P016 | Male | 23 | Positive | Negative | Negative | Positive | 74 | NA | ND | ND | ND | Negative | ND | ND | Clinically diagnosed TB |
| P017 | Female | 16 | Positive | Negative | Negative | Positive | 45 | Right | Positive | ND | ND | Negative | Negative | ND | Bacteriologically confirmed TB |
| P018 | Male | 28 | Positive | Positive | Negative | Positive | 58 | Left | ND | ND | ND | Negative | Negative | ND | Bacteriologically confirmed TB |
| P019 | Male | 66 | Negative | Negative | Negative | Negative | 13 | Left | ND | ND | ND | ND | ND | ND | Non-TB |
| P020 | Female | 47 | Positive | Negative | Negative | Negative | 26 | Left | ND | ND | ND | Negative | Negative | ND | Clinically diagnosed TB |
| P021 | Male | 43 | Negative | Negative | Positive | Positive | 43 | Left | ND | ND | ND | Positive | ND | ND | Bacteriologically confirmed TB |
| P022 | Male | 37 | Positive | Negative | Negative | Negative | 5 | Bilateral | ND | ND | ND | ND | ND | ND | Clinically diagnosed TB |
| P023 | Male | 44 | ND | Negative | Negative | Negative | 9 | NA | Positive | ND | ND | ND | ND | ND | Bacteriologically confirmed TB |
| P024 | Male | 27 | Positive | Negative | Negative | Negative | 17 | Right | ND | ND | ND | Negative | ND | ND | Clinically diagnosed TB |
| P025 | Male | 69 | Positive | Negative | Negative | Negative | 8 | Left | ND | ND | ND | Negative | ND | ND | Clinically diagnosed TB |
| P026 | Male | 63 | Positive | Negative | Negative | Positive | 51 | Bilateral | Negative | ND | Positive | Negative | Negative | ND | Clinically diagnosed TB |
| P027 | Male | 51 | Positive | Negative | Negative | Negative | 5 | Bilateral | ND | ND | ND | ND | ND | ND | Clinically diagnosed TB |
| P028 | Female | 52 | Positive | Negative | Negative | Positive | 67 | Bilateral | ND | ND | ND | ND | ND | ND | Clinically diagnosed TB |
| P029 | Male | 70 | Positive | Positive | Negative | Positive | 88 | Right | ND | ND | ND | Positive | ND | ND | Bacteriologically confirmed TB |
| P030 | Female | 69 | Positive | Negative | Negative | Negative | 32 | Left | ND | ND | ND | Negative | ND | ND | Clinically diagnosed TB |
| P031 | Male | 38 | Positive | ND | Negative | Positive | 34 | Left | ND | ND | ND | ND | ND | ND | Clinically diagnosed TB |
| P032 | Male | 66 | Negative | Negative | Negative | Negative | 8 | Right | ND | ND | ND | ND | ND | ND | Clinically diagnosed TB |
| P033 | Male | 19 | Positive | ND | Negative | Negative | 68 | Right | ND | ND | ND | ND | ND | Positive | Clinically diagnosed TB |
| P034 | Male | 19 | Positive | ND | Negative | Negative | 44 | Right | ND | ND | ND | ND | ND | ND | Clinically diagnosed TB |
| P035 | Female | 76 | Positive | ND | Positive | Positive | 86 | Bilateral | ND | ND | ND | ND | ND | ND | Bacteriologically confirmed TB |
| P036 | Male | 75 | ND | Negative | ND | Negative | ND | Bilateral | ND | ND | ND | Negative | ND | ND | Clinically diagnosed TB |
| P037 | Male | 75 | ND | ND | ND | Negative | 42 | Bilateral | Negative | ND | ND | ND | ND | ND | Clinically diagnosed TB |
| P038 | Male | 69 | Positive | Negative | ND | ND | 8 | Left | ND | ND | ND | Positive | ND | Positive | Bacteriologically confirmed TB |
| P039 | Male | 24 | Positive | ND | Negative | ND | 56 | Right | Positive | Positive | ND | Negative | Negative | ND | Bacteriologically confirmed TB |
| P040 | Male | 58 | Positive | Negative | ND | Negative | 45 | Bilateral | ND | ND | ND | ND | ND | ND | Clinically diagnosed TB |
| P041 | Male | 60 | Positive | Negative | ND | Negative | 39 | Bilateral | ND | ND | ND | Negative | ND | ND | Clinically diagnosed TB |
| P042 | Male | 59 | Positive | ND | ND | Negative | 35 | Right | ND | ND | ND | ND | ND | ND | Clinically diagnosed TB |
| P043 | Male | 31 | Positive | Positive | Positive | ND | ND | Right | Negative | ND | ND | Negative | ND | ND | Bacteriologically confirmed TB |
| P044 | Male | 74 | Positive | Negative | Negative | ND | 12 | Bilateral | ND | ND | ND | Negative | ND | ND | Clinically diagnosed TB |
| P045 | Male | 30 | ND | ND | ND | ND | ND | Left | ND | ND | ND | ND | ND | ND | Clinically diagnosed TB |
| P046 | Female | 23 | ND | Negative | ND | ND | 122 | Left | ND | ND | ND | Negative | Negative | ND | Clinically diagnosed TB |
| P047 | Male | 70 | Positive | Negative | Negative | ND | 9 | Right | ND | ND | ND | Negative | ND | ND | Clinically diagnosed TB |
| P048 | Male | 87 | Positive | Negative | ND | Negative | 9 | Bilateral | ND | ND | ND | Negative | ND | ND | Clinically diagnosed TB |
| P049 | Female | 25 | Positive | ND | ND | ND | 69 | Left | ND | ND | ND | ND | Positive | ND | Bacteriologically confirmed TB |
| P050 | Male | 62 | Positive | Negative | ND | Positive | 86 | Bilateral | ND | ND | ND | Negative | Negative | ND | Clinically diagnosed TB |
| P051 | Male | 20 | Positive | Negative | ND | Positive | 55 | Right | ND | ND | ND | Negative | Negative | ND | Clinically diagnosed TB |
| P052 | Female | 43 | Positive | Negative | ND | Negative | 48 | Left | ND | ND | ND | Negative | Negative | ND | Clinically diagnosed TB |
| P053 | Male | 73 | Positive | Negative | ND | Negative | 41 | Left | ND | ND | ND | Negative | Negative | ND | Clinically diagnosed TB |
| P054 | Male | 70 | Positive | Negative | ND | Negative | 16 | Left | ND | ND | ND | Negative | Negative | ND | Clinically diagnosed TB |
| P055 | Female | 77 | Negative | Negative | ND | Negative | 17 | Left | ND | ND | ND | Negative | Negative | ND | Non-TB |
| P056 | Male | 16 | ND | Positive | ND | Positive | 86 | Right | ND | ND | ND | Negative | Negative | ND | Bacteriologically confirmed TB |
| P057 | Male | 66 | Positive | Negative | ND | Negative | ND | Right | ND | ND | ND | Negative | Negative | ND | Clinically diagnosed TB |
| P058 | Male | 70 | Negative | Negative | ND | Negative | 13 | Left | ND | ND | ND | Negative | Negative | ND | Clinically diagnosed TB |
| P059 | Male | 94 | Negative | Negative | ND | Negative | 5 | Left | ND | ND | ND | Positive | Positive | ND | Bacteriologically confirmed TB |
| P060 | Male | 15 | Positive | Negative | ND | Negative | 73 | Bilateral | ND | ND | ND | Negative | Negative | ND | Clinically diagnosed TB |
| P061 | Male | 55 | Positive | Negative | ND | Negative | 52 | Left | ND | ND | ND | Positive | Negative | ND | Bacteriologically confirmed TB |
| P062 | Male | 85 | Negative | Negative | ND | Negative | 21 | Bilateral | Negative | Negative | ND | ND | ND | ND | Clinically diagnosed TB |
| P063 | Male | 57 | Negative | Negative | ND | ND | 12 | Bilateral | ND | ND | ND | ND | ND | ND | Clinically diagnosed TB |
| P064 | Male | 23 | Negative | ND | Positive | Positive | 56 | Right | ND | ND | ND | Positive | Negative | Positive | Bacteriologically confirmed TB |
| P065 | Male | 43 | Positive | Negative | Negative | Negative | 6 | Left | Negative | Negative | ND | ND | ND | ND | Clinically diagnosed TB |
| P066 | Male | 42 | Positive | Negative | ND | Positive | 45 | Right | ND | ND | ND | Positive | Positive | ND | Bacteriologically confirmed TB |
| P067 | Male | 22 | Positive | Negative | Negative | Negative | 5 | Bilateral | ND | ND | ND | ND | ND | ND | Clinically diagnosed TB |
| P068 | Female | 61 | Positive | Negative | Negative | Negative | 4 | Bilateral | ND | ND | ND | ND | ND | ND | Clinically diagnosed TB |
| P069 | Male | 45 | Negative | ND | Negative | Negative | 9 | Bilateral | ND | ND | ND | ND | ND | ND | Clinically diagnosed TB |
| P070 | Male | 31 | Positive | Positive | Positive | ND | ND | Right | Negative | ND | ND | Negative | Positive | ND | Bacteriologically confirmed TB |
| P071 | Male | 40 | Positive | Positive | Positive | Positive | ND | Left | ND | ND | ND | Negative | Negative | ND | Bacteriologically confirmed TB |
| P072 | Male | 46 | Positive | Negative | ND | Negative | ND | Right | ND | ND | ND | Negative | Negative | ND | Clinically diagnosed TB |
| P073 | Male | 48 | Negative | Negative | ND | ND | 15 | Bilateral | ND | ND | ND | Positive | Positive | ND | Bacteriologically confirmed TB |
| P074 | Male | 51 | Positive | Negative | Negative | Negative | 18 | Right | ND | ND | ND | Negative | ND | ND | Clinically diagnosed TB |
| P075 | Female | 47 | Positive | Negative | Negative | Positive | 30 | Left | ND | ND | ND | Negative | Negative | ND | Clinically diagnosed TB |
| P076 | Male | 20 | Positive | Negative | Negative | Negative | 2 | Bilateral | ND | ND | ND | ND | ND | ND | Clinically diagnosed TB |
| P077 | Male | 55 | ND | Negative | ND | Negative | 48 | Bilateral | Negative | ND | ND | ND | ND | ND | Clinically diagnosed TB |
| P078 | Male | 45 | Positive | Positive | Positive | ND | ND | Right | Positive | ND | Positive | Negative | ND | ND | Bacteriologically confirmed TB |
| P079 | Male | 60 | Indeterminate | Negative | Negative | ND | 3 | Right | ND | ND | ND | Negative | ND | ND | Non-TB |
| P080 | Male | 56 | Positive | Negative | ND | Negative | 41 | Right | ND | ND | ND | Negative | Negative | ND | Clinically diagnosed TB |
| P081 | Male | 55 | Negative | Negative | ND | Positive | 6 | Left | ND | ND | ND | Positive | Positive | ND | Bacteriologically confirmed TB |
| P082 | Female | 61 | Positive | Negative | Negative | Positive | 32 | Right | Positive | Positive | ND | Negative | Positive | Positive | Bacteriologically confirmed TB |
| P083 | Male | 67 | Positive | Positive | Positive | Positive | 70 | Left | ND | ND | ND | ND | Positive | Positive | Bacteriologically confirmed TB |
| P084 | Male | 20 | Positive | Negative | Negative | Negative | 63 | Right | ND | ND | ND | Negative | Negative | ND | Clinically diagnosed TB |
| P085 | Male | 48 | Positive | Positive | Positive | Positive | 65 | Left | Positive | ND | ND | Negative | Negative | Negative | Bacteriologically confirmed TB |
| P086 | Male | 56 | Negative | Negative | Negative | Negative | 7 | Right | ND | ND | ND | ND | ND | ND | Non-TB |
| P087 | Female | 33 | ND | ND | ND | Negative | 38 | Left | Negative | ND | ND | ND | ND | ND | Clinically diagnosed TB |
| P088 | Male | 40 | Positive | Negative | ND | Negative | 39 | Bilateral | ND | ND | ND | Negative | ND | ND | Clinically diagnosed TB |
| P089 | Male | 45 | Positive | Negative | Negative | Negative | 51 | Right | Negative | Negative | ND | Negative | Negative | ND | Clinically diagnosed TB |
| P090 | Male | 44 | Positive | Negative | ND | Negative | ND | Left | ND | ND | ND | Negative | ND | ND | Clinically diagnosed TB |
| P091 | Male | 29 | Positive | Positive | Positive | ND | 45 | Right | Negative | Negative | ND | Negative | ND | ND | Bacteriologically confirmed TB |
| P092 | Male | 47 | Negative | Negative | Negative | Negative | 23 | Left | ND | ND | ND | Negative | Negative | ND | Clinically diagnosed TB |
| P093 | Female | 46 | Positive | Negative | Positive | Positive | 44 | Right | Positive | ND | Positive | Negative | Negative | ND | Bacteriologically confirmed TB |
| P094 | Male | 25 | ND | Positive | Positive | Positive | 11 | NA | Positive | ND | ND | ND | ND | ND | Bacteriologically confirmed TB |
| P095 | Male | 70 | Positive | Positive | ND | Positive | 80 | Right | ND | ND | ND | Negative | ND | ND | Bacteriologically confirmed TB |
| P096 | Male | 49 | Positive | Negative | Negative | Positive | ND | Right | ND | ND | ND | ND | ND | ND | Clinically diagnosed TB |
| P097 | Male | 66 | ND | Negative | ND | Positive | 23 | Left | ND | ND | ND | Positive | ND | Positive | Bacteriologically confirmed TB |
| P098 | Female | 57 | Negative | Negative | Negative | Negative | 17 | Left | ND | ND | ND | Negative | Negative | ND | Non-TB |
| P099 | Male | 71 | Positive | Negative | ND | Positive | 4 | Left | ND | ND | ND | Positive | Positive | ND | Bacteriologically confirmed TB |
| P100 | Male | 37 | Positive | Negative | Negative | Negative | 9 | Bilateral | ND | ND | ND | ND | ND | ND | Clinically diagnosed TB |
| P101 | Female | 50 | Positive | Negative | ND | ND | 17 | Bilateral | ND | ND | ND | Negative | ND | ND | Clinically diagnosed TB |
| P102 | Male | 50 | Positive | ND | Negative | Negative | 5 | Left | Negative | Negative | ND | ND | ND | ND | Clinically diagnosed TB |
| P103 | Female | 28 | Negative | Negative | Positive | Positive | 45 | Right | Positive | Positive | Positive | Negative | Negative | Negative | Bacteriologically confirmed TB |
| P104 | Male | 48 | Positive | Negative | Negative | Negative | 30 | Bilateral | ND | ND | ND | Negative | Negative | ND | Clinically diagnosed TB |
| P105 | Male | 33 | Positive | Positive | Positive | Positive | 90 | Left | ND | ND | ND | Positive | ND | ND | Bacteriologically confirmed TB |
| P106 | Male | 38 | Positive | Negative | ND | Negative | ND | Bilateral | ND | ND | ND | ND | ND | ND | Clinically diagnosed TB |
| P107 | Male | 31 | Positive | Positive | Positive | ND | 55 | Right | Negative | ND | ND | Negative | ND | ND | Bacteriologically confirmed TB |
| P108 | Female | 54 | Positive | Negative | Negative | Positive | 47 | Right | ND | ND | ND | Negative | Negative | ND | Clinically diagnosed TB |
| P109 | Female | 58 | Positive | Negative | ND | Negative | 41 | Left | ND | ND | ND | Negative | Negative | ND | Clinically diagnosed TB |
| P110 | Male | 28 | Positive | Negative | Negative | ND | 50 | Bilateral | Positive | ND | Positive | Negative | Negative | ND | Bacteriologically confirmed TB |
| P111 | Male | 68 | ND | Negative | Negative | ND | 10 | Left | Negative | ND | ND | Negative | Negative | Negative | Non-TB |
| P112 | Male | 52 | Positive | ND | ND | ND | 27 | Bilateral | Positive | ND | Positive | Negative | ND | Positive | Bacteriologically confirmed TB |
| P113 | Male | 44 | Positive | Negative | ND | Negative | 18 | Left | ND | ND | ND | Negative | ND | ND | Clinically diagnosed TB |
| P114 | Male | 59 | Positive | Positive | ND | Positive | 59 | Right | Negative | Positive | Positive | Negative | ND | ND | Bacteriologically confirmed TB |
| P115 | Male | 26 | Positive | Negative | Negative | Positive | 16 | Bilateral | Positive | Positive | Positive | Negative | Negative | Positive | Bacteriologically confirmed TB |
| P116 | Female | 25 | Positive | Negative | ND | Negative | 55 | Right | Negative | Negative | Negative | Negative | ND | ND | Clinically diagnosed TB |
| P117 | Male | 39 | Positive | Positive | ND | Positive | 40 | Right | ND | ND | ND | Negative | ND | ND | Bacteriologically confirmed TB |
| P118 | Female | 67 | ND | Positive | Positive | Positive | 55 | Left | ND | ND | ND | Negative | Negative | ND | Bacteriologically confirmed TB |
| P119 | Male | 59 | Positive | Negative | ND | Negative | 3 | NA | ND | ND | ND | ND | ND | ND | Clinically diagnosed TB |
| P120 | Male | 47 | Positive | Negative | Negative | Negative | 7 | Right | ND | ND | ND | Negative | ND | ND | Clinically diagnosed TB |
| P121 | Female | 59 | ND | Positive | Positive | Positive | 47 | Left | ND | ND | ND | Negative | ND | ND | Bacteriologically confirmed TB |
| P122 | Male | 45 | Positive | Positive | Positive | Positive | 76 | Left | ND | ND | ND | ND | Positive | Positive | Bacteriologically confirmed TB |
| P123 | Female | 33 | ND | Positive | ND | Positive | 16 | Bilateral | ND | ND | ND | ND | ND | ND | Bacteriologically confirmed TB |
| P124 | Male | 25 | Negative | Negative | Negative | Positive | 51 | Right | Positive | ND | Positive | ND | ND | Negative | Bacteriologically confirmed TB |
| P125 | Male | 62 | Negative | Positive | Negative | ND | 57 | Left | ND | Positive | Positive | Negative | ND | ND | Bacteriologically confirmed TB |
| P126 | Male | 50 | Negative | Negative | Negative | Negative | 33 | Right | ND | ND | ND | Positive | ND | ND | Bacteriologically confirmed TB |
| P127 | Female | 24 | Positive | Positive | Positive | Positive | 28 | Bilateral | Positive | ND | ND | Negative | Negative | ND | Bacteriologically confirmed TB |
| P128 | Male | 39 | Indeterminate | Negative | Negative | Negative | 23 | Right | ND | ND | ND | ND | ND | ND | Clinically diagnosed TB |
| P129 | Male | 31 | Negative | Positive | Negative | Positive | 47 | Left | ND | ND | ND | ND | ND | ND | Bacteriologically confirmed TB |
| P130 | Male | 66 | ND | Positive | Positive | ND | 16 | Left | ND | ND | ND | Positive | Positive | Positive | Bacteriologically confirmed TB |
| P131 | Male | 40 | Positive | Positive | Positive | Positive | 7 | Right | Negative | Positive | Positive | ND | ND | ND | Bacteriologically confirmed TB |
| P132 | Male | 47 | Negative | Negative | ND | ND | 16 | Bilateral | ND | ND | ND | Negative | ND | ND | Clinically diagnosed TB |
| P133 | Male | 45 | Positive | Positive | Positive | Positive | 68 | Left | ND | ND | ND | ND | Negative | Positive | Bacteriologically confirmed TB |
| P134 | Male | 37 | Positive | Negative | Negative | Negative | 10 | Bilateral | ND | ND | ND | Negative | Negative | ND | Clinically diagnosed TB |
| P135 | Male | 27 | Negative | Negative | Negative | Negative | 7 | NA | ND | ND | ND | Negative | Negative | Negative | Non-TB |
| P136 | Male | 56 | ND | Positive | Positive | Positive | ND | Left | ND | ND | ND | Negative | ND | ND | Bacteriologically confirmed TB |
| P137 | Female | 66 | Positive | ND | Negative | ND | 13 | Right | Negative | Negative | ND | Negative | ND | ND | Clinically diagnosed TB |
| P138 | Male | 39 | Negative | Negative | ND | Negative | 31 | Left | ND | ND | Negative | Negative | Negative | Negative | Clinically diagnosed TB |
| P139 | Male | 55 | Positive | Negative | Negative | Negative | 49 | Right | Negative | Negative | Negative | Negative | Negative | Negative | Clinically diagnosed TB |
| P140 | Male | 40 | ND | Negative | ND | Negative | 23 | Right | ND | ND | ND | Negative | ND | ND | Clinically diagnosed TB |
| P141 | Female | 43 | Positive | Positive | Positive | Positive | 8 | Bilateral | Positive | ND | Positive | Negative | ND | ND | Bacteriologically confirmed TB |
| P142 | Male | 52 | Negative | Negative | Negative | Positive | ND | Left | Positive | Positive | Positive | Negative | Negative | Positive | Bacteriologically confirmed TB |

Abbreviation: MTB: mycobacterium tuberculosis, tNGS: targeted next-generation sequencing, ADA: adenosine deaminase, TB: tuberculosis, ND: not done, NA: not available.
